# Supplementary material
Source: Elsevier journal article supplement (https://www.sciencedirect.com/science/article/pii/S0214916821000747)
Supplement: mmc1 [file S0214916821000747:mmc1.doc]

Anexo. 1

INSTRUCCIONES: Este es un cuestionario diseñado para conocer el estilo de vida de las personas con diabetes tipo 2. Le agradeceremos que lea cuidadosamente las siguientes preguntas y conteste lo que usted considere que refleja mejor su estilo de vida en los últimos tres meses. Elija una sola opción. Le suplicamos responder todas las preguntas.

| 1. ¿Con qué frecuencia come verduras? | Todos los días de la semana | Algunos  días | Casi nunca |  |
| --- | --- | --- | --- | --- |
| 2. ¿Con qué frecuencia come frutas? | Todos los días de la semana | Algunos días | Casi nunca |  |
| 3. ¿Cuántas piezas de pan come al día? | 0 a 1 | 2 | 3 o más |  |
| 4. ¿Cuántas tortillas come al día? | 0 a 3 | 4 a 6 | 7 o más |  |
| 5. ¿Agrega azúcar a sus alimentos o bebidas? | Casi nunca | Algunas veces | Frecuentemente |  |
| 6. ¿Agrega sal a los alimentos cuando los está consumiendo? | Casi nunca | Algunas veces | Casi siempre |  |
| 7. ¿Come alimento entre comidas? | Casi nunca | Algunas veces | Frecuentemente |  |
| 8. ¿Come alimentos fuera de casa? | Casi nunca | Algunas veces | Frecuentemente |  |
| 9. Cuando termina de comer la cantidad servida inicialmente, ¿pide que le sirvan más? | Casi nunca | Algunas veces | Casi siempre |  |
| 10. ¿Con qué frecuencia hace al menos 15 minutos de ejercicio? (caminar rápido, correr o algún otro) | 3 ó más veces por semana | 1 a 2 veces por semana | Casi nunca |  |
| 11. ¿Se mantiene ocupado fuera de sus actividades habituales de trabajo? | Casi siempre | Algunas veces | Casi nunca |  |
| 12. ¿Qué hace con mayor frecuencia en su tiempo libre? | Salir de casa | Trabajos en casa | Ver televisión |  |
| 13. ¿Fuma? | No fumo | Algunas veces | Fumo a diario |  |
| 14. ¿Cuántos cigarrillos fuma al día? | Ninguno | 1 a 5 | 6 o más |  |
| 15. ¿Bebe alcohol? | Nunca | Rara vez | 1 vez o más por semana |  |
| 16. ¿Cuántas bebidas alcohólicas toma en cada ocasión? | Ninguna | 1 a 2 | 3 o más |  |
| 17. ¿A cuántas pláticas para personas con diabetes ha asistido? | 4 o más | 1 a 3 | ninguna |  |
| 18. ¿Trata de obtener información sobre diabetes? | Casi siempre | Algunas veces | Casi nunca |  |
| 19. ¿Se enoja con facilidad? | Casi nunca | Algunas veces | Casi siempre |  |
| 20. ¿Se siente triste? | Casi nunca | Algunas veces | Casi siempre |  |
| 21. ¿Tiene pensamientos pesimistas sobre su futuro? | Casi nunca | Algunas veces | Casi siempre |  |
| 22. ¿Hace su máximo esfuerzo por controlar su diabetes? | Casi siempre | Algunas veces | Casi nunca |  |
| 23. ¿Sigue dieta para controlar su diabetes? | Casi siempre | Algunas veces | Casi nunca |  |
| 24. ¿Olvida tomar sus medicamentos para la  diabetes o aplicarse insulina? | Casi nunca | Algunas veces | Frecuentemente |  |
| 25. ¿Sigue las instrucciones médicas que se le indican para su cuidado? | Casi siempre | Algunas veces | Casi nunca |  |

López-Carmona JM y col. Salud Publica Mex. 2003 ;45(4):259-68
